# Supplementary material for: Preindustrial to present-day changes in atmospheric carbon monoxide: agreements and gaps between ice archives and global model reconstructions
Source: Copernicus journal article supplement (doi:10.5194/egusphere-2024-653), 2024-04-17
Supplement: Supplementary file 1 [file egusphere-2024-653-supplement.pdf]

# Supplement of *Preindustrial to present-day changes in atmospheric carbon monoxide: agreements and gaps between ice archives and global model reconstructions*

5

Xavier Faïn<sup>1</sup>, Sophie Szopa<sup>2</sup>, Vaishali Naik<sup>3</sup>, Patricia Martinerie<sup>1</sup>, David M. Etheridge<sup>4,5</sup>, Rachael H. Rhodes<sup>6</sup>, Cathy M. Trudinger<sup>4,5</sup>, Vasilii V. Petrenko<sup>7</sup>, Kévin Fourteau<sup>8</sup>, Philip Place<sup>9</sup>

<sup>1</sup>Univ. Grenoble Alpes, CNRS, INRAE, IRD, Grenoble INP, IGE, 38000 Grenoble, France

10 <sup>2</sup>Laboratoire des Sciences du Climat et de l'Environnement, CEA, CNRS, UVSQ, Université Paris-Saclay, Gif-sur-Yvette, France

<sup>3</sup>NOAA Geophysical Fluid Dynamics Laboratory, Princeton, NJ, USA

<sup>4</sup>CSIRO Environment, Aspendale, Victoria, Australia

15 <sup>5</sup>Australian Antarctic Program Partnership, Institute for Marine and Antarctic Studies, University of Tasmania, Hobart, Tasmania, Australia

<sup>6</sup>Department of Earth Sciences, University of Cambridge, Cambridge, CB2 3EQ, UK

<sup>7</sup>Department of Earth and Environmental Sciences, University of Rochester, Rochester, NY 14627, USA

<sup>8</sup>Univ. Grenoble Alpes, Université de Toulouse, Météo-France, CNRS, CNRM, Centre d'Études de la Neige, Grenoble, France

20 <sup>9</sup>University Instrumentation Center, University of New Hampshire, Durham, NH, 03824, USA

*Correspondence to:* Xavier Faïn (xavier.fain@univ-grenoble-alpes.fr)

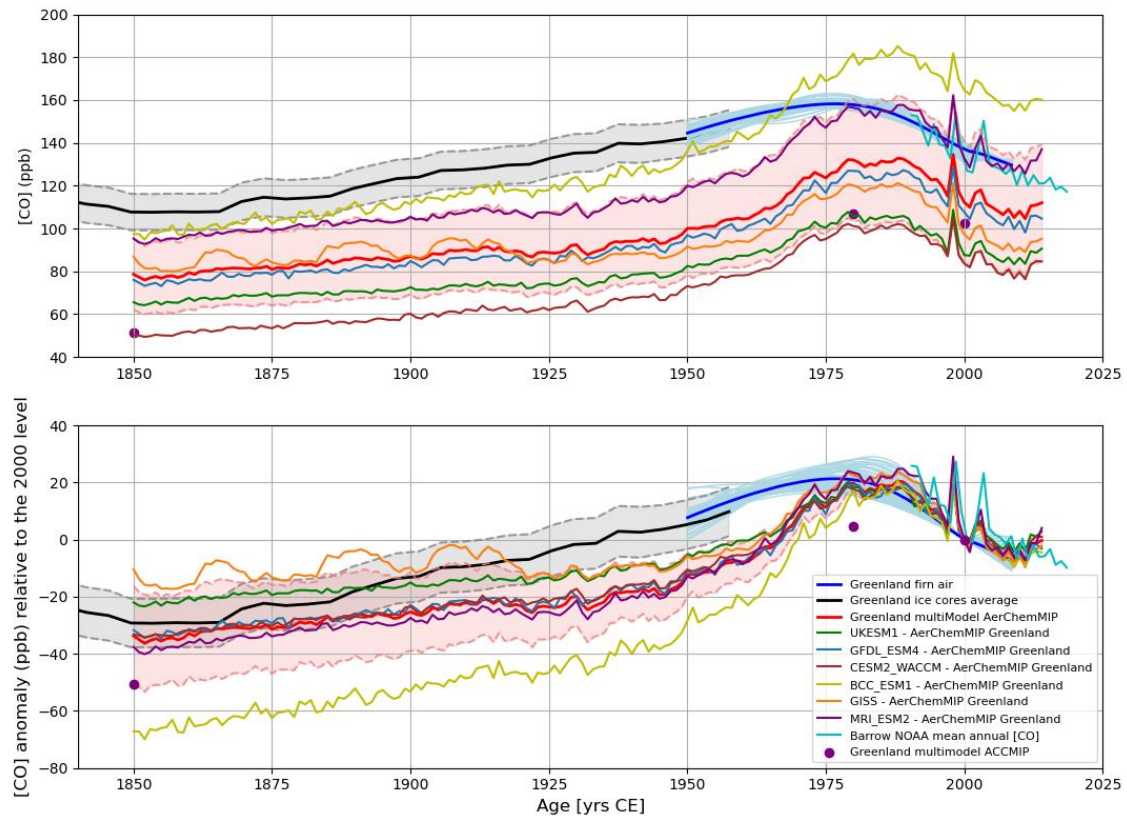

25

**Figure S1.** Individual AerChemMIP and ACCMIP model outputs included in this study for the Greenland area. Absolute values (upper panel) and anomalies relative to the 2000 CE levels (lower panel).

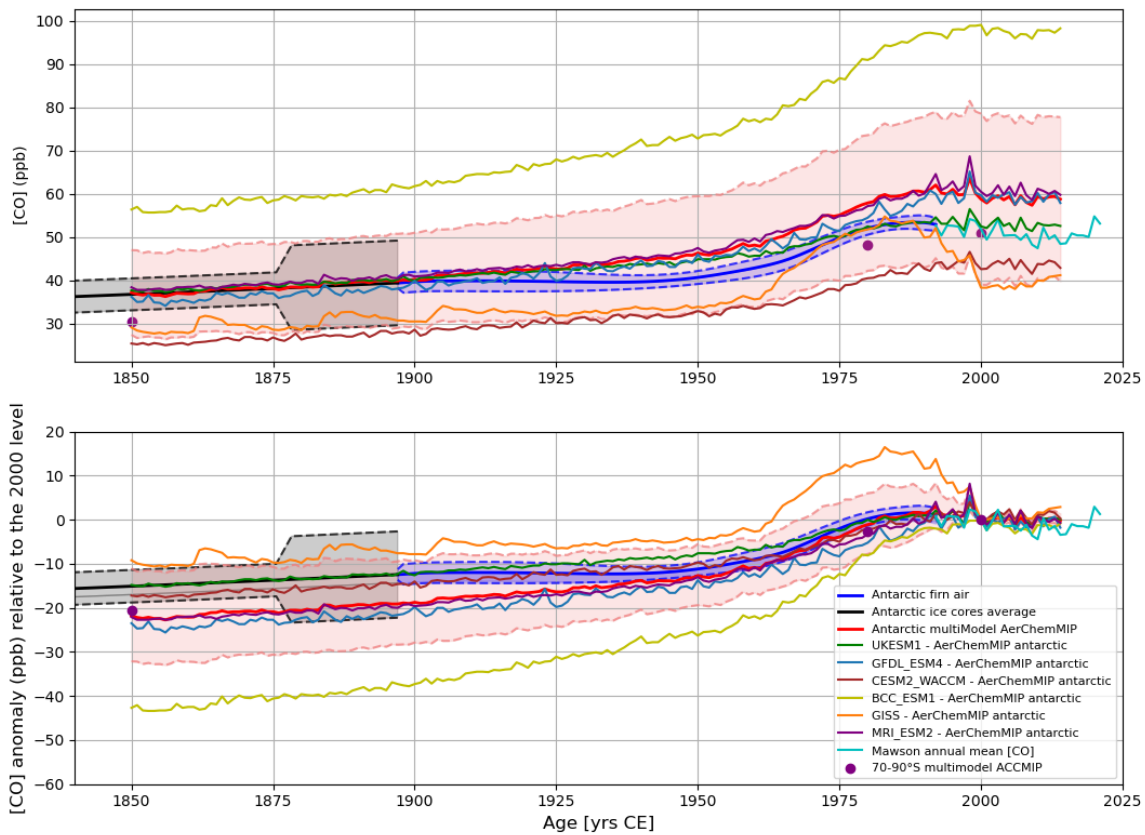

30

**Figure S2.** Individual AerChemMIP and ACCMIP model outputs included in this study for the Antarctica area. Absolute values (upper panel) and anomalies relative to the 2000 CE levels (lower panel).
